# Supplementary material for: Phenylthiolate as a σ- and π- donor ligand: synthesis of a 3-D organometallic coordination polymer [K2Fe(SPh)4]n
Source: Royal Society of Chemistry journal article supplement (doi:10.1039/b404443f), 2004-01-01
Supplement: b404443f.doc [file b404443f.doc]

**Thiophenolate (Phenyl Thiolate) as a – and – Donor Ligands: Synthesis of a 3-D Organometallic Coordination Polymer [K2Fe(SPh)4]n**

Xiao-Yan Yu,*a* Guo-Xin Jin**ab* and Lin-Hong Weng*b*

a State Key Laboratory of Polymer Physics and Chemistry, Changchun Institute of Applied Chemistry, Chinese Academy of Sciences, Changchun 130022, P. R. China.

b Department of Chemistry, Fudan University, Shanghai 200433, P. R. China. Fax: (+86)-21-65643776; E-mail: [gxjin@fudan.edu.cn](mailto:gxjin@ciac.jl.cn)

Supporting Information:

Experimental preparation for **1**: After having been flame-dried three times, a Schlenk tube containing Fe powder (56 mg, 1.0 mmol), Ph2S2 (872 mg, 4.0mmol) and potassium (117mg, 3.0mmol) in THF (40ml) was kept at 40oC while the reaction mixture was stirred for 2 days. A clear solution was isolated by centrifugation. Hexane (40ml) was slowly added on top of the THF solution and brown-yellow crystals of **1** were obtained after several days. Yield, 197mg (34.6% based on Fe). IR (KBr, cm-1): 3067, 1576, 1559, 1473, 1460, 1432, 1384, 1261, 1122, 1086, 1063, 1024, 895, 746, 692, 482, 420. Anal. Calcd for C24H20FeK2S4: Fe, 9.79; K, 13.67; C, 50.51; H, 3.53%. Found: Fe, 10.12; K, 14.28; C, 50.12; H, 3.88%.
